# Supplementary material
Source: publisher site journal article supplement (https://www.dovepress.com/article/607566)
Supplement: Supplementary file 1 [file 607566%20Supplementary%20Material.docx]

**Supplementary Table:**

Suppl. Table 1: Node-splitting GH table

| Side | Direct | | Indirect | | Difference | | P＞|z| | tau |
| --- | --- | --- | --- | --- | --- | --- | --- | --- |
|  | Coef. | Std. Err. | Coef. | Std. Err. | Coef. | Std. Err. |  |  |
| A B * | -3.520 | 6.384 | 0.000 | 129.125 | -3.520 | 129.282 | 0.978 | 6.162 |
| B C * | 12.570 | 6.599 | 19.596 | 632.697 | -7.026 | 632.723 | 0.991 | 6.159 |
| B D * | 0.610 | 6.410 | 7.636 | 632.770 | -7.026 | 632.797 | 0.991 | 6.159 |
| B E * | -21.418 | 3.205 | -14.383 | 316.532 | -7.034 | 316.546 | 0.982 | 6.161 |

Suppl. Table 1: Data were obtained from node-splitting analysis for consistency test23.

Abbreviations: A=high-voltage pulsed radiofrequency (HPRF); B=pulsed radiofrequency (PRF); C=PRF combined with drug therapy (PRF+drug); D=spinal cord stimulation (SCS); E=sham control.

*Indicates the node-splitting comparison between two interventions.

Suppl. Table 2: League table on GH

| PRF+drug | HPRF | SCS | PRF | Sham |
| --- | --- | --- | --- | --- |
| PRF+drug | -9.06 (-27.04, 8.92) | -11.96 (-29.99, 6.07) | -12.57 (-25.50, 0.36) | **-33.99 (-48.36, -19.61)** |
| 9.06 (-8.92, 27.04) | HPRF | -2.90 (-20.61, 14.81) | -3.51 (-16.00, 8.98) | **-24.93 (-38.91, -10.95)** |
| 11.96 (-6.07, 29.99) | 2.90 (-14.81, 20.61) | SCS | -0.61 (-13.17, 11.95) | **-22.03 (-36.07, -7.98)** |
| 12.57 (-0.36, 25.50) | 3.51 (-8.98, 16.00) | 0.61 (-11.95, 13.17) | HPRF | **-21.42 (-27.70, -15.14)** |
| **33.99 (19.61, 48.36)** | **24.93 (10.95, 38.91)** | **22.03 (7.98, 36.07)** | **21.42 (15.14, 27.70)** | Sham |

Suppl. Table 2: Data are presented as mean difference (MD, 95% confidence interval [CI])23.24. Bold values denote statistically significant comparisons (95% CI does not cross zero).

Abbreviations: PRF: Pulsed radiofrequency, HPRF: High-Voltage PRF, SCS: spinal cord stimulation, Sham: without radiofrequency energy output, PRF+drug: PRF combined with intravenous injection of drugs.

Suppl. Table 3: Node-splitting MH table

| Side | Direct | | Indirect | | Difference | | P＞|z| | tau |
| --- | --- | --- | --- | --- | --- | --- | --- | --- |
|  | Coef. | Std. Err. | Coef. | Std. Err. | Coef. | Std. Err. |  |  |
| A B * | -4.530 | 2.321 | 0.000 | 129.115 | -4.530 | 129.136 | 0.972 | 2.999 |
| B C * | 24.930 | 3.464 | 33.987 | 632.525 | -9.057 | 632.529 | 0.989 | 2.999 |
| B D * | 1.520 | 3.481 | 10.577 | 632.264 | -9.057 | 632.269 | 0.989 | 2.999 |
| B E * | -21.774 | 1.678 | -12.715 | 316.221 | -9.058 | 316.224 | 0.977 | 2.999 |

Suppl. Table 3: Data were obtained from node-splitting analysis for consistency test23.

Abbreviations: A=high-voltage pulsed radiofrequency (HPRF); B=pulsed radiofrequency (PRF); C=PRF combined with drug therapy (PRF+drug); D=spinal cord stimulation (SCS); E=sham control.

*Indicates the node-splitting comparison between two interventions.

Suppl. Table 4: League table on MH

| PRF+drug | HPRF | SCS | PRF | Sham |
| --- | --- | --- | --- | --- |
| PRF+drug | **-20.40 (-28.57, -12.23)** | **-23.41 (-33.04, -13.78)** | **-24.93 (-31.72, -18.14)** | **-46.70 (-54.25, -39.16)** |
| **20.40 (12.23, 28.57)** | HPRF | -3.01 (-11.21, 5.19) | -4.53 (-9.08, 0.02) | **-26.30 (-31.91, -20.69)** |
| **23.41 (13.78, 33.04)** | 3.01 (-5.19, 11.21) | SCS | -1.52 (-8.34, 5.30) | **-23.29 (-30.87, -15.72)** |
| **24.93 (18.14, 31.72)** | 4.53 (-0.02, 9.08) | 1.52 (-5.30, 8.34) | PRF | **-21.77 (-25.06, -18.48)** |
| **46.70 (39.16, 54.25)** | **26.30 (20.69, 31.91)** | **23.29 (15.72, 30.87)** | **21.77 (18.48, 25.06)** | Sham |

Suppl. Table 4: Data are presented as mean difference (MD, 95% confidence interval [CI])23.24. Bold values denote statistically significant comparisons (95% CI does not cross zero).

Abbreviations: PRF: Pulsed radiofrequency, HPRF: High-Voltage PRF, SCS: spinal cord stimulation, Sham: without radiofrequency energy output, PRF+drug: PRF combined with intravenous injection of drugs.

Suppl. Table 5: Node-splitting VT table

| Side | Direct | | Indirect | | Difference | | P＞|z| | tau |
| --- | --- | --- | --- | --- | --- | --- | --- | --- |
|  | Coef. | Std. Err. | Coef. | Std. Err. | Coef. | Std. Err. |  |  |
| A B * | -4.300 | 2.278 | 4.401 | 141.422 | -4.300 | 141.440 | 0.976 | 1.503 |
| B C * | 17.290 | 2.773 | 25.888 | 632.468 | -8.598 | 632.466 | 0.989 | 1.502 |
| B D * | -0.010 | 2.030 | 8.586 | 631.723 | -8.596 | 631.723 | 0.989 | 1.502 |
| B E * | -18.770 | 1.676 | -10.171 | 365.001 | -8.599 | 364.999 | 0.981 | 1.502 |

Suppl. Table 5: Data were obtained from node-splitting analysis for consistency test23.

Abbreviations: A=high-voltage pulsed radiofrequency (HPRF); B=pulsed radiofrequency (PRF); C=PRF combined with drug therapy (PRF+drug); D=spinal cord stimulation (SCS); E=sham control.

*Indicates the node-splitting comparison between two interventions.

Suppl. Table 6: League table on VT

| PRF+drug | HPRF | SCS | PRF | Sham |
| --- | --- | --- | --- | --- |
| PRF+drug | **-12.99 (-20.02, -5.96)** | **-17.30 (-24.04, -10.56)** | **-17.29 (-22.73, -11.85)** | **-36.06 (-42.41, -29.71)** |
| **12.99 (5.96, 20.02)** | HPRF | -4.31 (-10.29, 1.67) | -4.30 (-8.76, 0.16) | **-23.07 (-28.61, -17.53)** |
| **17.30 (10.56, 24.04)** | 4.31 (-1.67, 10.29) | SCS | 0.01 (-3.97, 3.99) | **-18.76 (-23.92, -13.60)** |
| **17.29 (11.85, 22.73)** | 4.30 (-0.16, 8.76) | -0.01 (-3.99, 3.97) | PRF | **-18.77 (-22.06, -15.48)** |
| **36.06 (29.71, 42.41)** | **23.07 (17.53, 28.61)** | **18.76 (13.60, 23.92)** | **18.77 (15.48, 22.06)** | Sham |

Suppl. Table 6: Data are presented as mean difference (MD, 95% confidence interval [CI])23.24. Bold values denote statistically significant comparisons (95% CI does not cross zero).

Abbreviations: PRF: Pulsed radiofrequency, HPRF: High-Voltage PRF, SCS: spinal cord stimulation, Sham: without radiofrequency energy output, PRF+drug: PRF combined with intravenous injection of drugs.

Suppl. Table 7: Node-splitting Pregabalin table

| Side | Direct | | Indirect | | Difference | | P＞|z| | tau |
| --- | --- | --- | --- | --- | --- | --- | --- | --- |
|  | Coef. | Std. Err. | Coef. | Std. Err. | Coef. | Std. Err. |  |  |
| A C * | 29.430 | 66.123 | 6.004 | 122.101 | 23.426 | 138.856 | 0.866 | 66.023 |
| B C * | 42.030 | 63.762 | 5.652 | 652.228 | 36.378 | 655.358 | 0.956 | 63.657 |
| C D * | -63.310 | 65.938 | -113.661 | 652.409 | 50.351 | 655.274 | 0.939 | 63.617 |
| C E * | -139.870 | 64.564 | -190.221 | 652.270 | 50.351 | 655.272 | 0.939 | 63.617 |
| C F * | -51.417 | 45.633 | -103.361 | 468.913 | 51.944 | 471.050 | 0.912 | 63.912 |
| C G * | 247.169 | 46.221 | 195.225 | 468.968 | 51.944 | 471.051 | 0.912 | 63.912 |

Suppl. Table 7: Data were obtained from node-splitting analysis for consistency test23. *Indicates the node-splitting comparison between two interventions.

Abbreviations: A=high-voltage pulsed radiofrequency (HPRF); B=long-term PRF (LPRF); C=pulsed radiofrequency (PRF); D=PRF combined with methylene blue (PRF+MB); E=PRF combined with drug therapy (PRF+drug); F=spinal cord stimulation (SCS); G=sham control.

Suppl. Table 8: League table on Pregabalin

| PRF+drug | PRF+MB | SCS | LPRF | HPRF | PRF | Sham |
| --- | --- | --- | --- | --- | --- | --- |
| PRF+drug | 76.56 (-101.54, 254.66) | 88.48 (-63.82, 240.77) | 98.64 (-76.33, 273.61) | 115.85 (-48.90, 280.59) | **140.34 (15.76, 264.92)** | **387.08 (234.10, 540.05)** |
| -76.56 (-254.66, 101.54) | PRF+MB | 11.92 (-142.62, 166.46) | 22.08 (-154.85, 199.01) | 39.29 (-127.53, 206.11) | 63.78 (-63.54, 191.09) | **310.52 (155.31, 465.72)** |
| -88.48 (-240.77, 63.82) | -11.92 (-166.46, 142.62) | SCS | 10.16 (-140.77, 161.10) | 27.37 (-111.63, 166.37) | 51.86 (-35.80, 139.52) | **298.60 (173.86, 423.33)** |
| -98.64 (-273.61, 76.33) | -22.08 (-199.01, 154.85) | -10.16 (-161.10, 140.77) | LPRF | 17.20 (-146.21, 180.62) | 41.69 (-81.20, 164.59) | **288.43 (136.81, 440.06)** |
| -115.85 (-280.59, 48.90) | -39.29 (-206.11, 127.53) | -27.37 (-166.37, 111.63) | -17.20 (-180.62, 146.21) | HPRF | 24.49 (-85.37, 134.35) | **271.23 (131.45, 411.01)** |
| **-140.34 (-264.92, -15.76)** | -63.78 (-191.09, 63.54) | -51.86 (-139.52, 35.80) | -41.69 (-164.59, 81.20) | -24.49 (-134.35, 85.37) | PRF | **246.74 (157.90, 335.58)** |
| **-387.08 (-540.05, -234.10)** | **-310.52 (-465.72, -155.31)** | **-298.60 (-423.33, -173.86)** | **-288.43 (-440.06, -136.81)** | **-271.23 (-411.01, -131.45)** | **-246.74 (-335.58, -157.90)** | Sham |

Suppl. Table 8. Data are presented as mean difference (MD, 95% confidence interval [CI])23.24. Bold values denote statistically significant comparisons (95% CI does not cross zero).

Abbreviations: PRF: Pulsed radiofrequency, H-PRF: High-Voltage PRF, L-PRF：long-term PRF，SVB: select nerve block, PRF+SVB：PRF combined with nerve block therapy，SCS: spinal cord stimulation, Oral-drug: Only oral-drug, PRF+MB:PRF combined with methylene blue paravertebral nerve block, BoNT-A: injection of BoNT-A in the lesion area, PRF+PRP: PRF combined with platelet rich plasma injection on the dorsal root ganglion, Sham: without radiofrequency energy output, PRF+drug: PRF combined with intravenous injection of drugs.

Supplementary Figure:


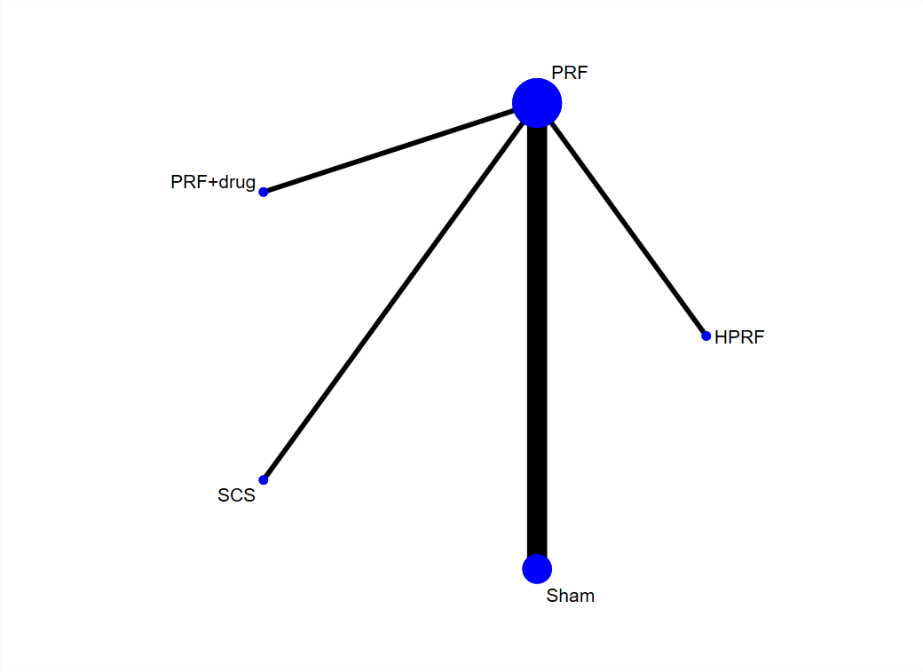


Suppl. Fig. 1 NMA figure for GH

Network evidence structure of included interventions for General Health (GH) score. Nodes represent each intervention, with size proportional to the number of studies. Lines represent direct head-to-head comparisons, with width proportional to the number of included trials.


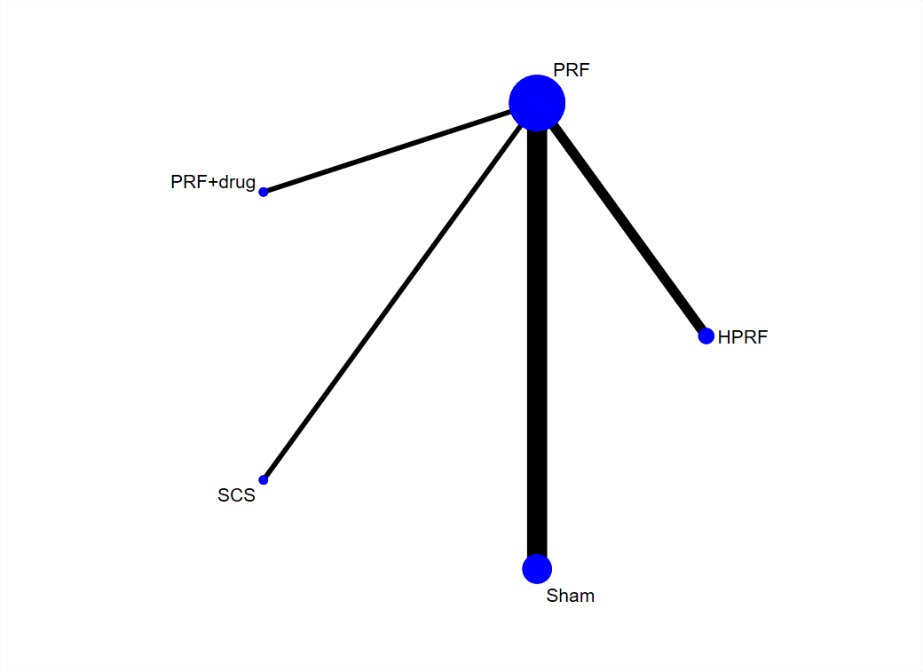


Suppl. Fig. 2 NMA figure for MH

Network evidence structure of included interventions for Mental Health (MH) score. Nodes represent each intervention, with size proportional to the number of studies. Lines represent direct head-to-head comparisons, with width proportional to the number of included trials


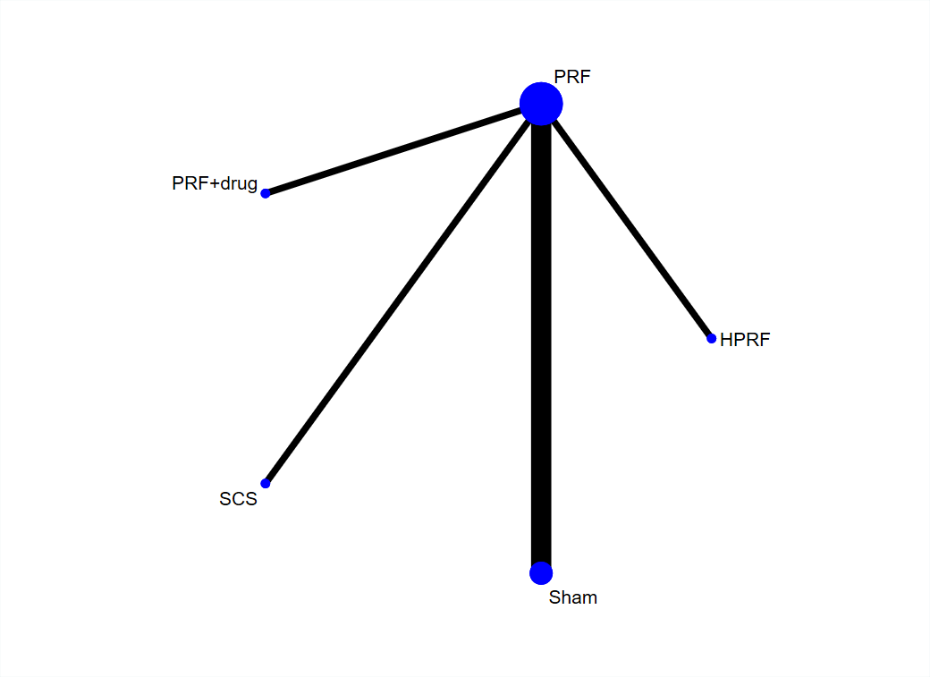


Suppl. Fig.3: NMA figure for VT

Network evidence structure of included interventions for Vitality (VT) score. Nodes represent each intervention, with size proportional to the number of studies. Lines represent direct head-to-head comparisons, with width proportional to the number of included trials.


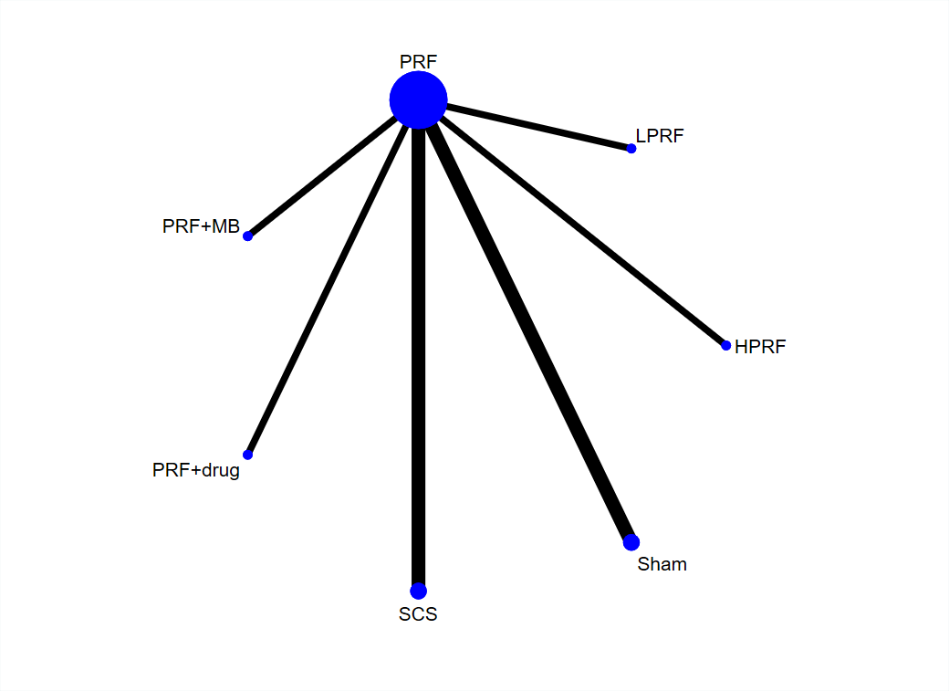


Suppl. Fig.4: NMA figure for Doses of Pregabalin

Network evidence structure of included interventions for pregabalin dosage. Nodes represent each intervention, with size proportional to the number of studies. Lines represent direct head-to-head comparisons, with width proportional to the number of included trials.


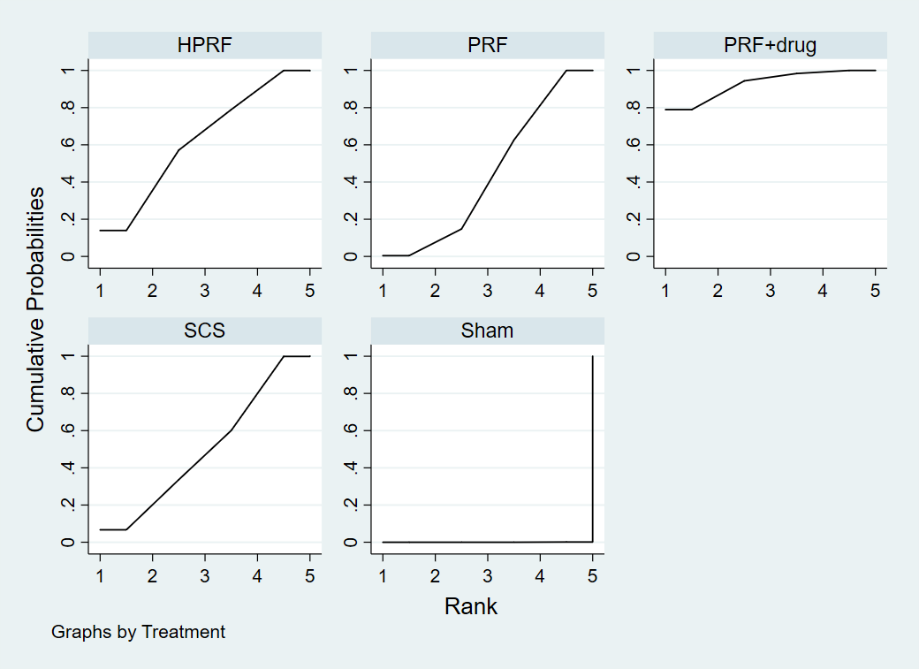


Suppl. Fig. 5. SUCRA plot for GH

Surface under the cumulative ranking curve (SUCRA) probabilities for General Health (GH) score. A higher SUCRA value indicates a higher probability of being the optimal intervention.


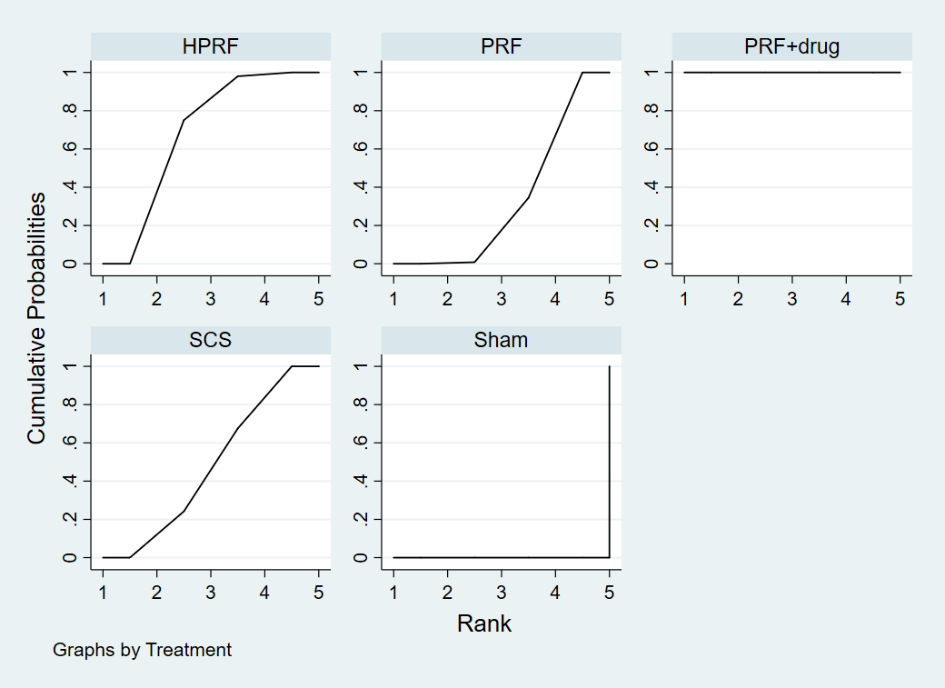


Suppl. Fig. 6. SUCRA plot for MH

Surface under the cumulative ranking curve (SUCRA) probabilities for Mental Health (MH) score. A higher SUCRA value indicates a higher probability of being the optimal intervention.


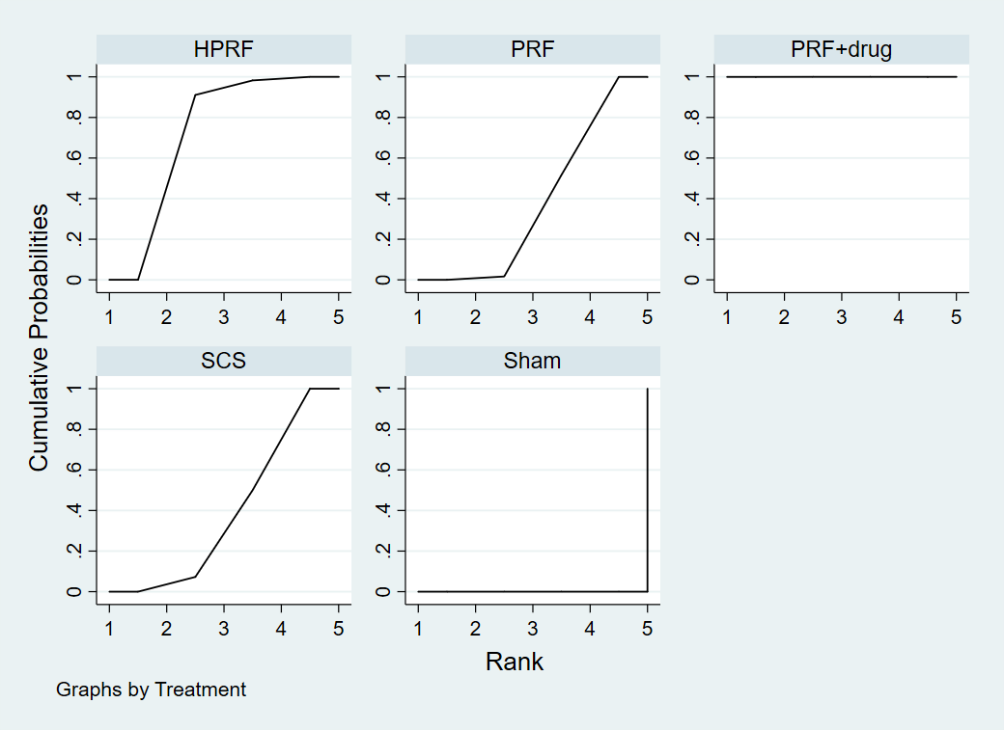


Suppl. Fig. 7. SUCRA plot for VT

Surface under the cumulative ranking curve (SUCRA) probabilities for Vitality (VT) score. A higher SUCRA value indicates a higher probability of being the optimal intervention.


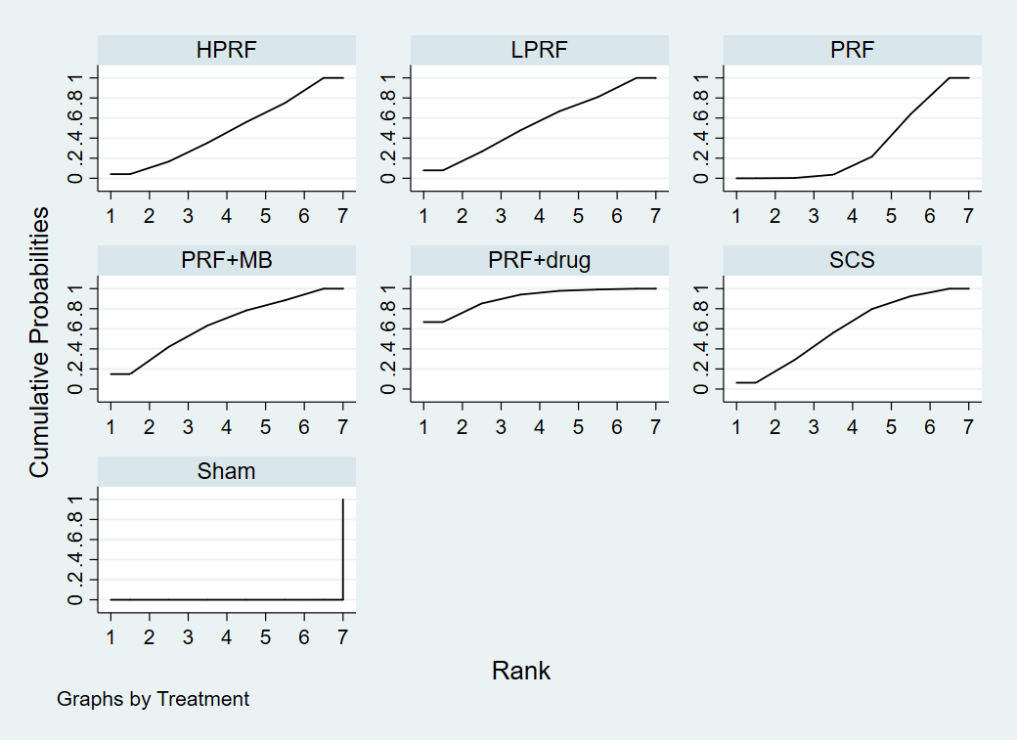


Suppl. Fig. 8. SUCRA plot for Doses of Pregabalin

Surface under the cumulative ranking curve (SUCRA) probabilities for pregabalin dosage. A higher SUCRA value indicates a higher probability of being the optimal intervention for reducing medication dose.
